# Supplementary material for: Sheep’s Butter and Correspondent Buttermilk Produced with Sweet Cream and Cream Fermented by Aromatic Starter, Kefir and Probiotic Culture
Source: MDPI journal article supplement (doi:10.3390/foods12020331), 2023-01-10
Supplement: s1 [file s1]

## SUPPLEMENTARY MATERIAL

**Table S1.** Sensory characteristics of sheep's butters produced with sweet cream and with cream fermented with different starter cultures. Sensory scores of butters at the beginning (7 days) and at the end of storage (90 days).

| Butter              | Aroma       |             | Taste       |             | Texture     |             | Rank        |             |
|---------------------|-------------|-------------|-------------|-------------|-------------|-------------|-------------|-------------|
|                     | 7 days      | 90 days     |
| <b>S-Sweet</b>      | 3.94 ± 0.77 | 3.90 ± 1.12 | 4.03 ± 0.87 | 4.05 ± 0.94 | 4.06 ± 0.85 | 3.90 ± 1.07 | 2.23 ± 1.17 | 2.40 ± 1.27 |
| <b>A-Aromatic</b>   | 3.58 ± 0.85 | 3.70 ± 1.03 | 3.77 ± 0.99 | 3.50 ± 1.19 | 3.87 ± 1.09 | 3.50 ± 1.19 | 2.57 ± 1.04 | 2.95 ± 1.0  |
| <b>K-Kefir</b>      | 3.67 ± 0.76 | 3.95 ± 0.69 | 3.63 ± 1.07 | 3.85 ± 0.81 | 3.77 ± 0.94 | 3.95 ± 0.69 | 2.93 ± 1.17 | 2.30 ± 1.08 |
| <b>P-Probiotics</b> | 3.97 ± 0.75 | 3.75 ± 0.79 | 3.84 ± 0.86 | 3.85 ± 1.04 | 3.92 ± 0.73 | 3.60 ± 0.82 | 2.27 ± 1.01 | 2.35 ± 1.09 |

**Table S2.** Sensory characteristics of sheep's buttermilks produced with sweet cream and with cream fermented with different starter cultures.

| Buttermilk          | Aroma       | Taste       | Consistency | Rank        | Global evaluation |
|---------------------|-------------|-------------|-------------|-------------|-------------------|
| <b>S-Sweet</b>      | 2.57 ± 1.04 | 2.67 ± 1.03 | 3.03 ± 1.03 | 2.67 ± 1.24 | 2.63 ± 0.93       |
| <b>A-Aromatic</b>   | 2.83 ± 1.09 | 2.25 ± 1.01 | 2.67 ± 0.96 | 3.13 ± 0.94 | 2.35 ± 0.99       |
| <b>K-Kefir</b>      | 3.27 ± 0.94 | 3.10 ± 0.92 | 3.77 ± 0.9  | 1.93 ± 0.98 | 3.30 ± 1.02       |
| <b>P-Probiotics</b> | 3.33 ± 1.12 | 2.60 ± 1.07 | 3.50 ± 0.82 | 2.23 ± 0.97 | 3.10 ± 0.92       |
